# Supplementary material for: Comparison of the Ammonia Trapping Performance of Different Gas-Permeable Tubular Membrane System Configurations
Source: MDPI journal article supplement (doi:10.3390/membranes12111104), 2022-11-05
Supplement: s1 [file s1]

# Comparison of the Ammonia Trapping Performance of Different Gas-Permeable Tubular Membrane System Configurations

M. Soto-Herranz, M. Sánchez-Báscones, M.C. García-González, P. Martín-Ramos

## SUPPLEMENTARY MATERIAL

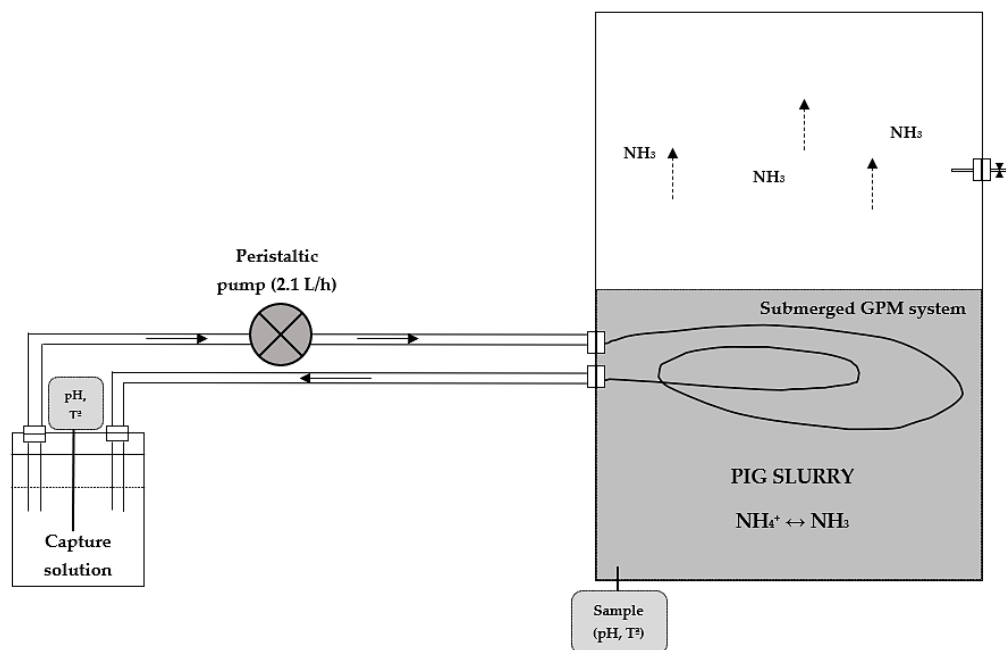

**Figure S1.** Scheme of the  $\text{NH}_3$  capture process in the GPM S1 system, consisting of a submerged membrane without agitation or aeration of pig slurry.

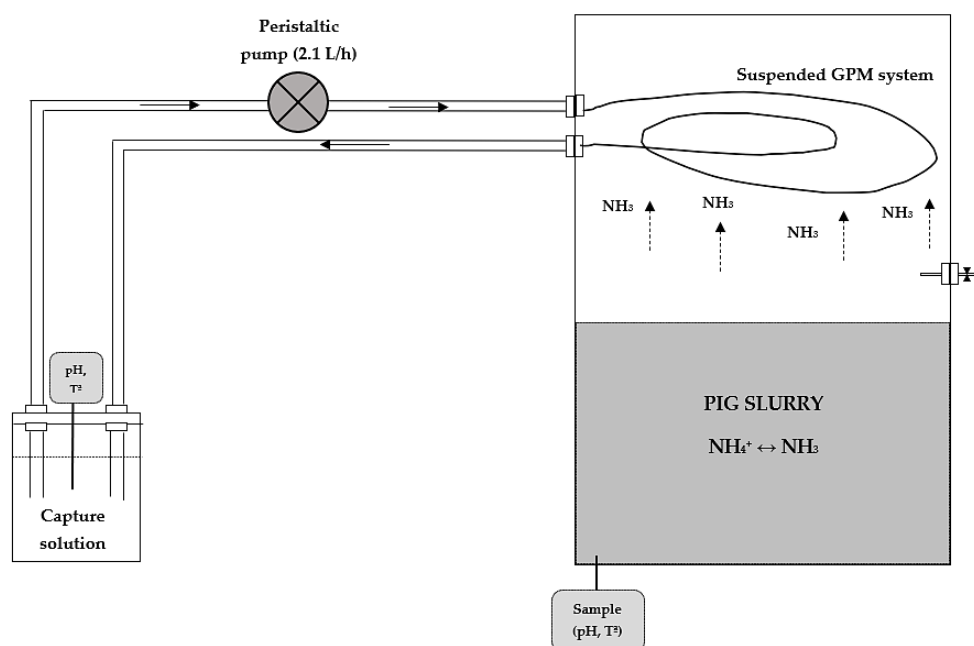

**Figure S2.** Scheme of the  $\text{NH}_3$  capture process in the GPM S2 system, consisting of a suspended membrane without agitation or aeration of pig slurry.

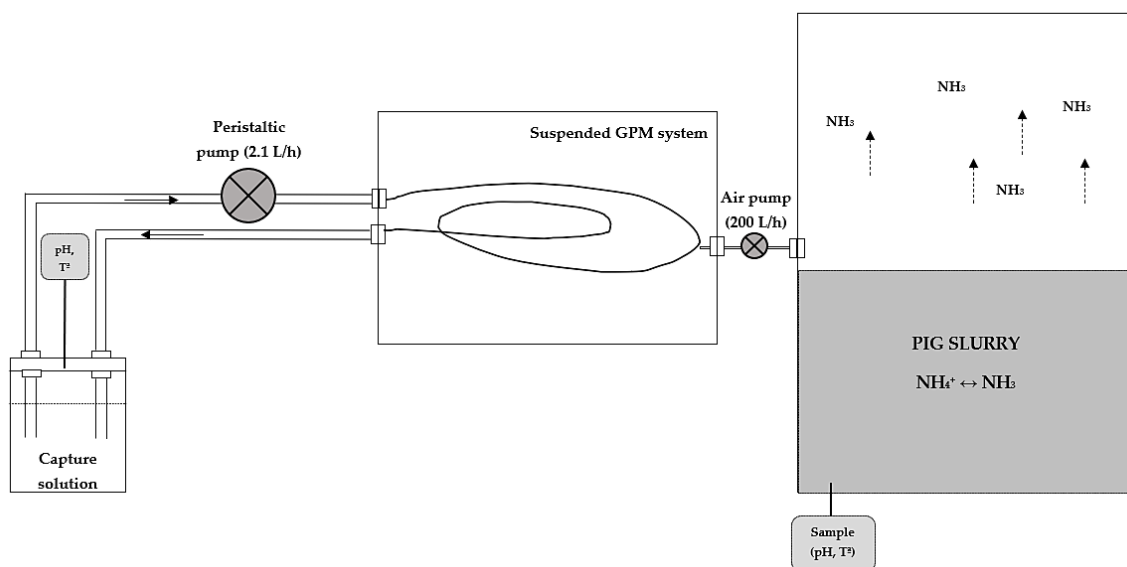

**Figure S3.** Scheme of the  $\text{NH}_3$  capture process in the GPM S3 system, consisting of a membrane suspended in a compartment attached to the slurry treatment chamber, from which the  $\text{NH}_3$ -laden air is sucked in.

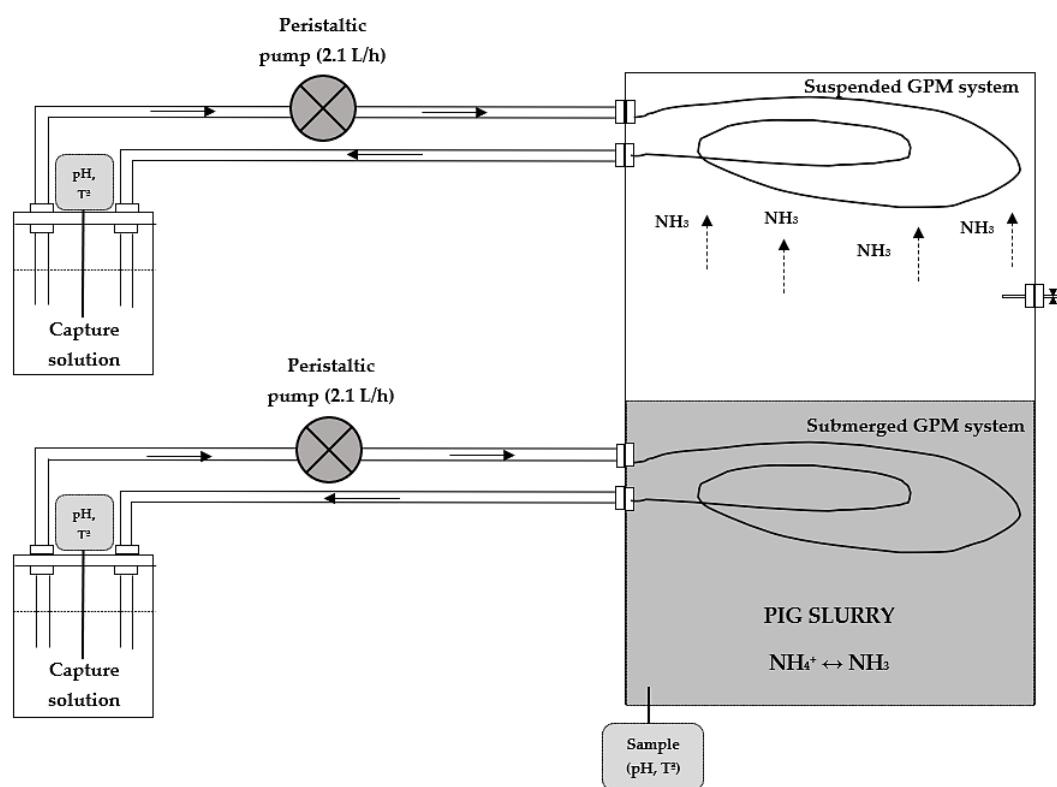

**Figure S4.** Scheme of the  $\text{NH}_3$  capture process in the GPM S4 system consisting of a submerged and a suspended membrane without agitation and aeration of pig slurry.

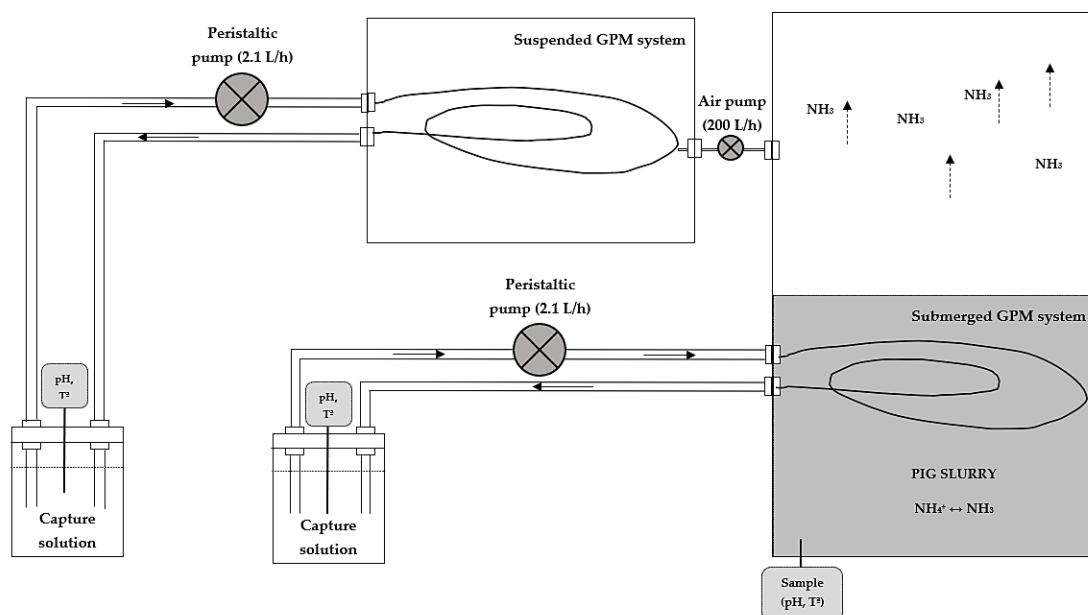

**Figure S5.** Scheme of the  $\text{NH}_3$  capture process in the GPM S5 system, consisting of a suspended membrane in a compartment attached to the slurry treatment chamber, from which the  $\text{NH}_3$ -laden air is sucked in, and a submerged membrane without agitation and aeration of pig slurry.

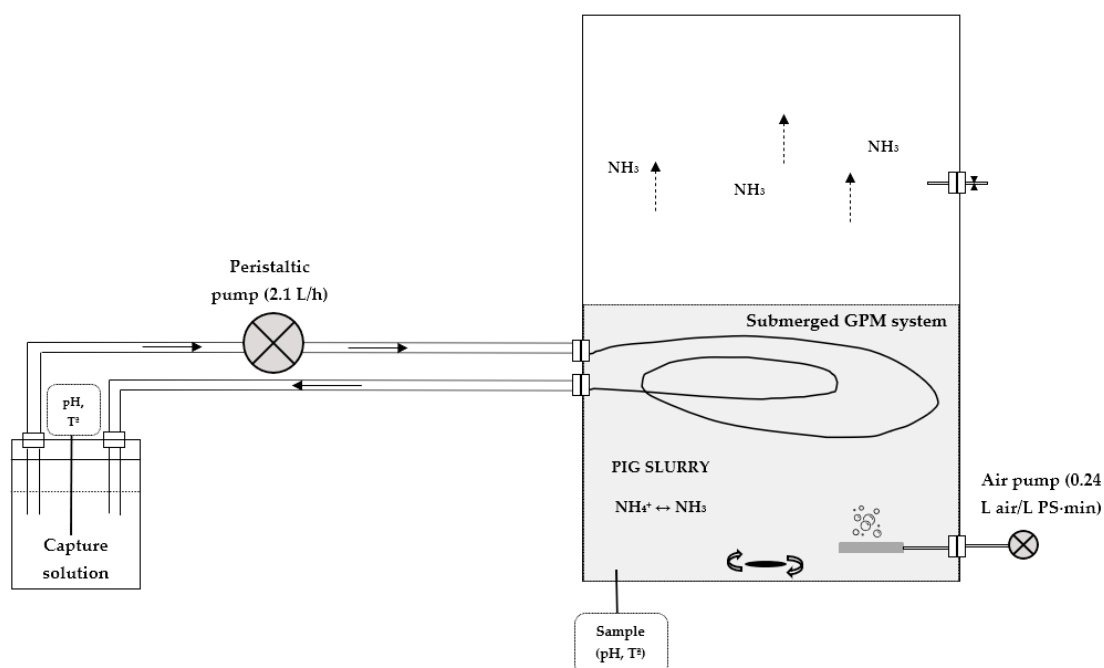

**Figure S6.** Scheme of the  $\text{NH}_3$  capture process in the GPM S6 system, consisting of a submerged membrane with agitation and aeration of pig slurry.

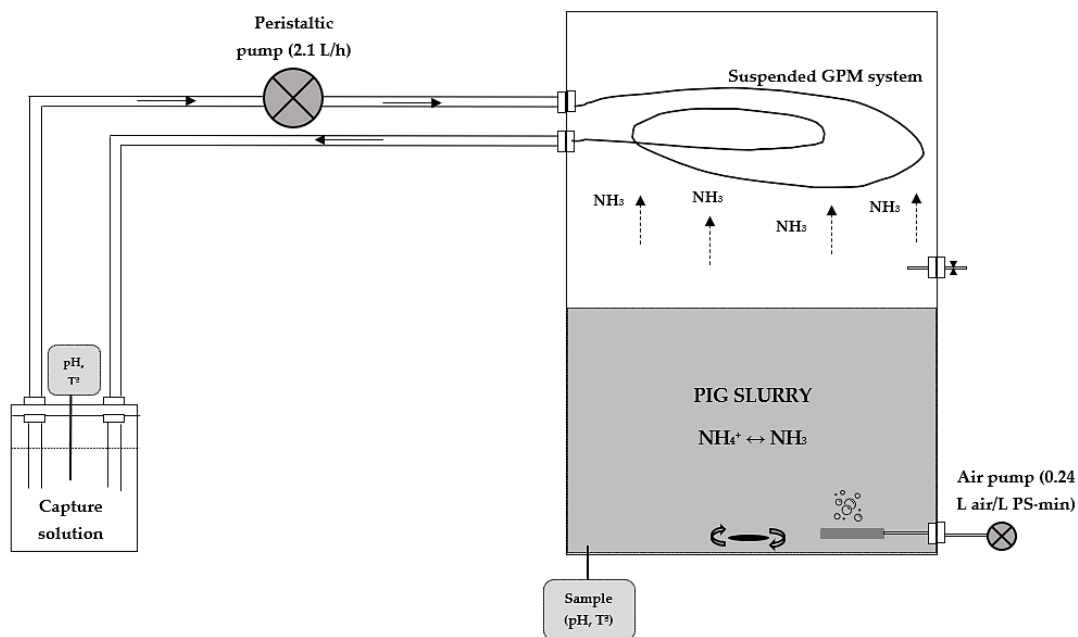

**Figure S7.** Scheme of the  $\text{NH}_3$  capture process in the GPM S7 system, consisting of a suspended membrane with agitation and aeration of pig slurry.

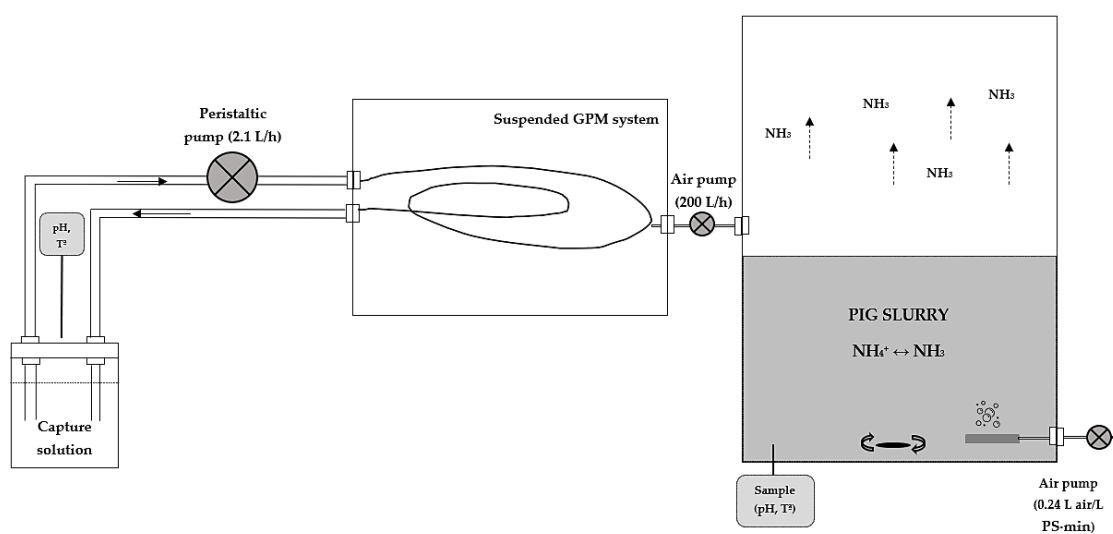

**Figure S8.** Scheme of the  $\text{NH}_3$  capture process in the GPM S8 system, consisting of a membrane suspended in a compartment attached to the slurry treatment chamber with agitation and aeration of pig slurry, from which  $\text{NH}_3$ -laden air is sucked in.

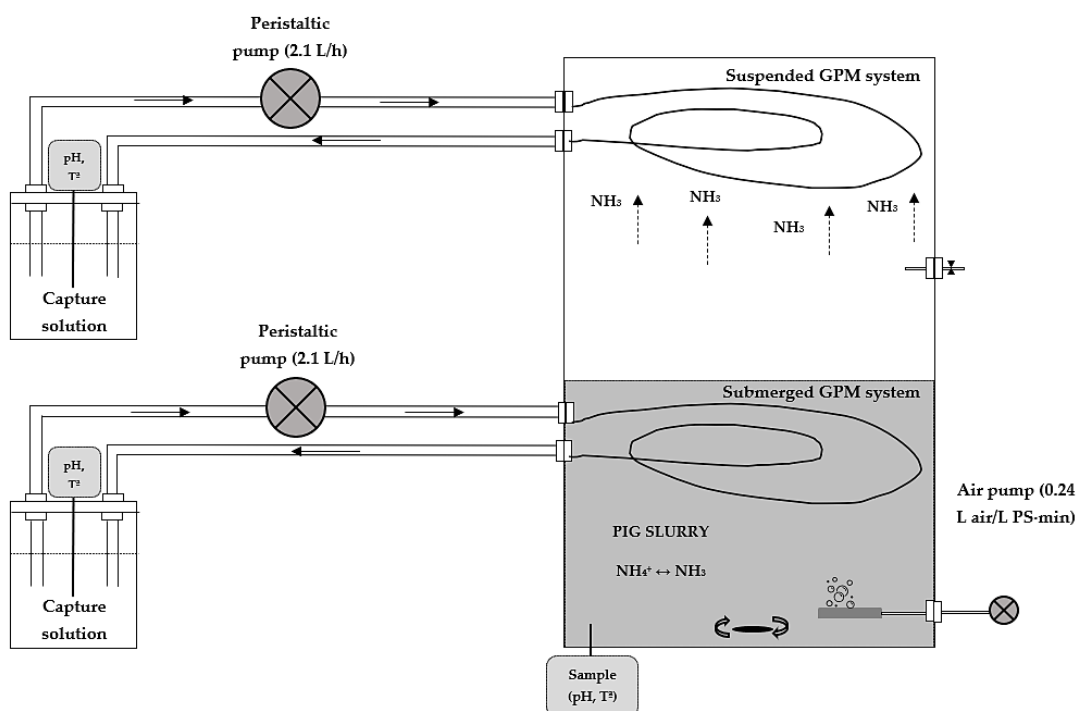

**Figure S9.** Scheme of the  $\text{NH}_3$  capture process in the GPM S9 system, consisting of a submerged and a suspended membrane with agitation and aeration of pig slurry.

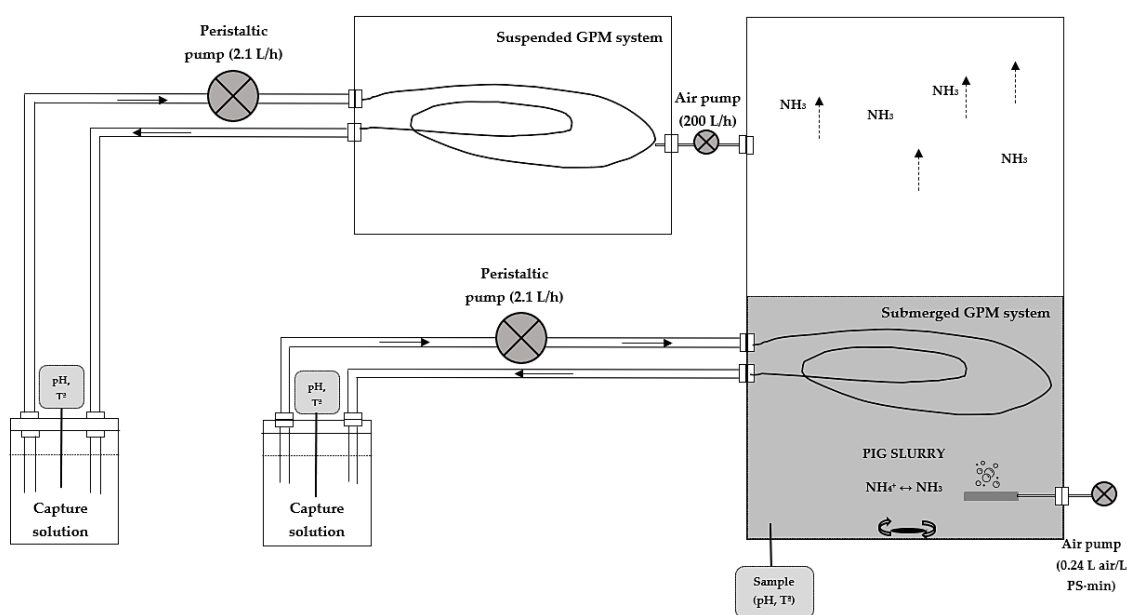

**Figure S10.** Scheme of the  $\text{NH}_3$  capture process in the GPM S10 system, consisting of a suspended membrane in a compartment attached to the slurry treatment chamber, from which the  $\text{NH}_3$ -laden air is sucked in, and a submerged membrane with agitation and aeration of pig slurry.

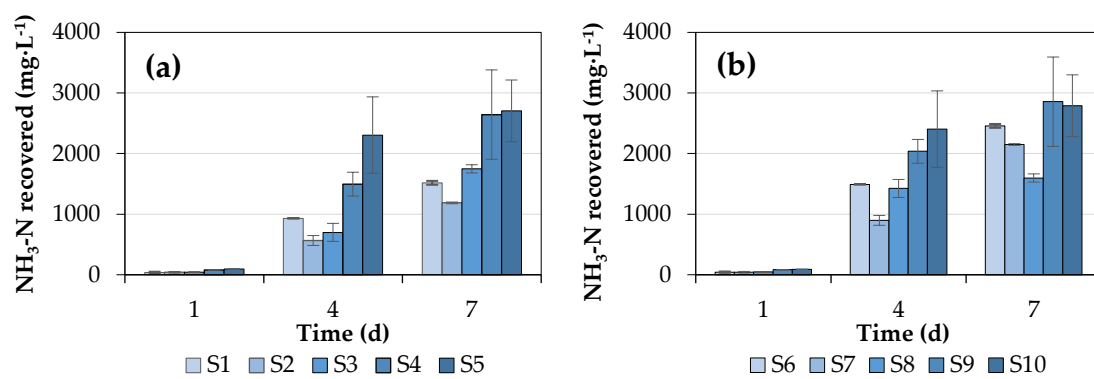

**Figure S11.** Evolution of  $\text{NH}_3\text{-N}$  concentration in the acid capture solution in (a) systems S1-S5 without slurry aeration and agitation; and (b) systems S6-S10 with slurry agitation and aeration. The meaning of the abbreviations is presented in section 2.2.
